# Supplementary material
Source: HighWire-hosted journal article supplement (https://bmjopen.bmj.com/content/9/1/e022084)
Supplement: inline-supplementary-material-1 [file inline-supplementary-material-1.pdf]

## Supplemental File 1. Guidance and frameworks identified which assisted in IPT development

| Guidance and Frameworks Identified |                                                                                                                                                                                                                                                                                                                                                                                                                                                                                                                                                                                                                                                                                                                                                                                                                                                                                                                                                                                                                                                                                                                                                                                                                                                                                                                                                                                                                                                                                                                                                                                                                                                                                                                                                                                                                                                                                                                                                                                                                                                                                                                                                                                                                                                                                                                                                                                                                                                                                                                                                                                                                                                                                                                                                                                              |
|------------------------------------|----------------------------------------------------------------------------------------------------------------------------------------------------------------------------------------------------------------------------------------------------------------------------------------------------------------------------------------------------------------------------------------------------------------------------------------------------------------------------------------------------------------------------------------------------------------------------------------------------------------------------------------------------------------------------------------------------------------------------------------------------------------------------------------------------------------------------------------------------------------------------------------------------------------------------------------------------------------------------------------------------------------------------------------------------------------------------------------------------------------------------------------------------------------------------------------------------------------------------------------------------------------------------------------------------------------------------------------------------------------------------------------------------------------------------------------------------------------------------------------------------------------------------------------------------------------------------------------------------------------------------------------------------------------------------------------------------------------------------------------------------------------------------------------------------------------------------------------------------------------------------------------------------------------------------------------------------------------------------------------------------------------------------------------------------------------------------------------------------------------------------------------------------------------------------------------------------------------------------------------------------------------------------------------------------------------------------------------------------------------------------------------------------------------------------------------------------------------------------------------------------------------------------------------------------------------------------------------------------------------------------------------------------------------------------------------------------------------------------------------------------------------------------------------------|
| <b>Scale-Up</b>                    | <p>Scale-up frameworks are categorised into; determinant frameworks, process models and evaluative frameworks (depending on their primary focus) as per Nilsen <sup>1</sup>;</p> <p><b>Determinant frameworks</b></p> <ul style="list-style-type: none"> <li>• Scaling up health service innovations: a framework for action, ExpandNet<sup>2 3</sup></li> <li>• Dynamic Sustainability Framework (DSF)<sup>4</sup></li> <li>• A framework for understanding the constraints of scaling up<sup>5</sup></li> <li>• Scaling up; A proposed framework for success<sup>6</sup></li> <li>• The non-adoption, abandonment, scale-up, spread, and sustainability (NASSS) for patient facing health and care technologies<sup>7</sup></li> <li>• The learning process approach<sup>8</sup></li> <li>• Conceptual framework for priority setting in health<sup>9</sup></li> </ul> <p><b>Process Models</b></p> <ul style="list-style-type: none"> <li>• Scaling up Management (SUM) Framework<sup>10</sup>, updated by<sup>11</sup></li> <li>• Practical guidance for scaling up health service innovations, ExpandNet<sup>12</sup></li> <li>• Nine steps for delivering a scale up strategy, ExpandNet<sup>13</sup></li> <li>• Beginning with the end in mind, ExpandNet<sup>14</sup></li> <li>• SEED Scale<sup>15</sup></li> <li>• A guide to scaling up population health interventions<sup>16</sup></li> <li>• IHI framework for going to full scale<sup>17</sup></li> <li>• A guide to fostering change to scale up effective health services<sup>18</sup></li> <li>• AIDED model for dissemination, diffusion and scale up of family health innovations in LICs<sup>19</sup></li> <li>• Program assessment guide for scaling up nutrition interventions<sup>20</sup></li> <li>• Scaling up breastfeeding<sup>21</sup></li> <li>• MuSCLE framework<sup>22</sup></li> </ul> <p><b>Evaluative Frameworks</b></p> <ul style="list-style-type: none"> <li>• Scaling out<sup>23</sup></li> </ul> <p>Not specific to scale-up but highlighted to be of relevance to implementation and adapting for local context were;</p> <ul style="list-style-type: none"> <li>• Consolidated Framework For Implementation Research (CFIR)<sup>24 25</sup></li> <li>• Promoting Action on Research Implementation (PARIHS) Framework<sup>26</sup></li> <li>• Integrated i-PARIHS Framework<sup>27</sup></li> <li>• Knowledge to action framework<sup>28</sup></li> <li>• Implementation Research (IR) Toolkit<sup>29</sup></li> <li>• Taxonomy of implementation outcomes<sup>30</sup></li> <li>• RE-AIM (Reach, Effectiveness, Adoption, Implementation and Maintenance) Framework<sup>31 32</sup></li> <li>• Methods to Improve the Selection and Tailoring of Implementation Strategies<sup>33</sup></li> </ul> |

|                                                                                                              |                                                                                                                                                                                                                                                                                                                                                                                                                                                                                                                                                                                                                                                                                                                                                                                                                                                                                                                                                                                                                                                                                                                                               |
|--------------------------------------------------------------------------------------------------------------|-----------------------------------------------------------------------------------------------------------------------------------------------------------------------------------------------------------------------------------------------------------------------------------------------------------------------------------------------------------------------------------------------------------------------------------------------------------------------------------------------------------------------------------------------------------------------------------------------------------------------------------------------------------------------------------------------------------------------------------------------------------------------------------------------------------------------------------------------------------------------------------------------------------------------------------------------------------------------------------------------------------------------------------------------------------------------------------------------------------------------------------------------|
| <b>Adaptation</b>                                                                                            | <ul style="list-style-type: none"> <li>• Elements to consider in cultural programme adaptation<sup>34</sup></li> <li>• Finding the balance program fidelity and adaptation in substance abuse prevention<sup>35</sup></li> <li>• Key principles for adapting research based interventions in HIV<sup>36</sup></li> <li>• Intervention mapping to adapt an effective HIV, sexually transmitted disease, and pregnancy prevention programs<sup>37</sup></li> <li>• ADAPT MAP draft guidance for adapting HIV interventions<sup>38</sup></li> <li>• ADAPT-ITT model for adapting EBI for HIV<sup>39</sup></li> <li>• Replicating effective programs (REP) framework<sup>40</sup></li> <li>• ADAPTE guidelines<sup>41</sup></li> </ul>                                                                                                                                                                                                                                                                                                                                                                                                            |
| <b>Fidelity</b><br>(including Intervention Development and Testing)                                          | <ul style="list-style-type: none"> <li>• Bauman's parameters for consideration in intervention development<sup>42</sup></li> <li>• The conceptual framework for adaptive interventions<sup>43</sup></li> <li>• NIH Behaviour Change Consortium (BCC) fidelity concepts<sup>44</sup></li> <li>• Comprehensive intervention fidelity guide<sup>45</sup></li> <li>• Carroll's conceptual framework for implementation fidelity<sup>46</sup></li> <li>• Hasson's modified conceptual framework for implementation fidelity<sup>47</sup></li> <li>• The modified Carroll's fidelity framework<sup>48</sup></li> <li>• Fidelity variation concepts from ASSIST RCT<sup>49</sup></li> <li>• Figuring out fidelity<sup>50</sup></li> <li>• Contextualised Interventions<sup>51</sup></li> <li>• Medical Research Council (MRC) guidance for process evaluations<sup>52</sup></li> <li>• The conceptual model for translating evidence based Interventions into community Settings<sup>53</sup></li> <li>• Template for Intervention Description and Replication (TIDieR) guidance<sup>54</sup></li> <li>• RE-AIM framework<sup>31 32</sup></li> </ul> |
| <b>Some examples from the wider literature</b><br>(including general implementation literature and theories) | <p>Some examples of wider literature used to also inform IPT Framework (please note this is not comprehensive and all wider literature is referenced in the full research logbook available on request);</p> <ul style="list-style-type: none"> <li>• Mechanisms for scale-up by Willis and colleagues<sup>55</sup> and large system transformation in healthcare by Best and colleagues<sup>56</sup></li> <li>• Barriers and facilitators to scale-up, Norton and Mittman<sup>57</sup></li> <li>• Diffusions of innovation theory, Rogers<sup>58</sup></li> <li>• Complex adaptive systems theory, Paine and colleagues<sup>59</sup></li> </ul>                                                                                                                                                                                                                                                                                                                                                                                                                                                                                              |

## References:

1. Nilsen P. Making sense of implementation theories, models and frameworks. *Implement Sci* 2015;**10**:53. doi: 10.1186/s13012-015-0242-0
2. Simmons R, Fajans P, Ghiron L. Scaling up health service delivery: from pilot innovations to policies and programmes. Geneva: ExpandNet, World Health Organisation, 2007:1-208.
3. World Health Organisation. The WHO Strategic Approach to strengthening sexual and reproductive health policies and programmes. WHO/RHR/077. Geneva: World Health Organisation, 2007:1-8.
4. Chambers DA, Glasgow RE, Stange KC. The dynamic sustainability framework: addressing the paradox of sustainment amid ongoing change. *Implement Sci* 2013;**8**:117. doi: 10.1186/1748-5908-8-117
5. Hanson K, Ranson MK, Oliveira-Cruz V, et al. Expanding access to priority health interventions: a framework for understanding the constraints to scaling-up. *Journal of International Development* 2003;**15**:1-14. doi: 10.1002/jid.963

6. Yamey G. Scaling Up Global Health Interventions: A Proposed Framework for Success. *PLoS Med* 2011;**8**:e1001049. doi: 10.1371/journal.pmed.1001049
7. Greenhalgh T, Wherton J, Papoutsi C, et al. Beyond Adoption: A New Framework for Theorizing and Evaluating Nonadoption, Abandonment, and Challenges to the Scale-Up, Spread, and Sustainability of Health and Care Technologies. *J Med Internet Res* 2017;**19**:e367. doi: 10.2196/jmir.8775 [published Online First: 3 November 2017]
8. Korten CD. Community Organization and Rural Development: A Learning Process Approach. *Public Adm Rev* 1980;**40**: doi: 10.2307/3110204
9. Gericke CA, Kurowski C, Ranson MK, et al. Intervention complexity--a conceptual framework to inform priority-setting in health. *Bull World Health Organ* 2005;**83**:285-93. doi: /S0042-96862005000400013 [published Online First: 4 May 2005]
10. Kohl R, Cooley L. Scaling Up-A Conceptual and Operational Framework. Washington, DC: Management Systems International 2003:1-31.
11. Cooley L, Ved R. Scaling Up—From Vision to Large-Scale Change: A Management Framework for Practitioners. Washington DC.: Management Systems International 2012:1-54.
12. World Health Organization. Practical guidance for scaling up health service innovations. Geneva: World Health Organisation, 2009:54-54.
13. World Health Organisation, ExpandNet. Nine steps for developing a scaling-up strategy. Geneva: Expandnet, World Health Organisation, 2010:1-35.
14. World Health Organisation, ExpandNet. Beginning with the end in mind: planning pilot projects and other programmatic research for successful scaling up. Geneva: Expandnet, World Health Organisation. , 2011:1-18.
15. Taylor-Ide LC. SEED-Scale.Training Manual & Toolkit. [http://www.seed-scale.org/sites/seed-scale.org/files/SEED-SCALE\\_TrainingManual.Final\\_.pdf](http://www.seed-scale.org/sites/seed-scale.org/files/SEED-SCALE_TrainingManual.Final_.pdf). 2012. (accessed 28th November 2017).
16. Milat AJ, Newson R, King L. Increasing the scale of population health interventions: a guide. Evidence and Evaluation Guidance Series, Population and Public Health Division. NSW Ministry of Health. <http://www.health.nsw.gov.au/research/Publications/scalability-guide.pdf>. 2014. (accessed 28th November 2017).
17. Barker PM, Reid A, Schall MW. A framework for scaling up health interventions: lessons from large-scale improvement initiatives in Africa. *Implement Sci* 2016;**11**:12. doi: 10.1186/s13012-016-0374-x
18. World Health Organisation. Guide to fostering change to scale up effective health services. Geneva: World Health Organisation, 2013:1-58.
19. Bradley EH, Curry LA, Taylor LA, et al. A model for scale up of family health innovations in low-income and middle-income settings: a mixed methods study. *BMJ Open* 2012;**2**: doi: 10.1136/bmjopen-2012-000987 [published Online First: 28 August 2012]
20. Pelletier D, Corsi A, Hoey L, et al. The program assessment guide: An approach for structuring contextual knowledge and experience to improve the design, delivery, and effectiveness of nutrition interventions. *J Nutr* 2011;**141**:2084-91. doi: 10.3945/jn.110.134916
21. Bhandari N, Kabir AK, Salam MA. Mainstreaming nutrition into maternal and child health programmes: scaling up of exclusive breastfeeding. *Matern Child Nutr* 2008;**4**:5-23. doi: 10.1111/j.1740-8709.2007.00126.x [published Online First: 20 March 2008]
22. Downs TJ, Larson HJ. Achieving Millennium Development Goals for health: building understanding, trust and capacity to respond. *Health Policy* 2007;**83**:144-61. doi: 10.1016/j.healthpol.2007.02.008 [published Online First: 3 April 2007]
23. Aarons GA, Sklar M, Mustanski B, et al. "Scaling-out" evidence-based interventions to new populations or new health care delivery systems. *Implement Sci* 2017;**12**:111. doi: 10.1186/s13012-017-0640-6

24. Damschroder LJ, Aron DC, Keith RE, et al. Fostering implementation of health services research findings into practice: a consolidated framework for advancing implementation science. *Implement Sci* 2009;**4**:50. doi: 10.1186/1748-5908-4-50
25. CFIR Research Team. Consolidated Framework for Implementation Research. CFIR Technical Assistance Website. <http://cfirguide.org/constructs.html>. 2014. (accessed 23rd Feb 2016).
26. Rycroft-Malone J. The PARIHS framework – a framework for guiding the implementation of evidence-based practice. *J Nurs Care Qual* 2004;**19**: doi: 10.1097/00001786-200410000-00002
27. Harvey G, Kitson A. PARIHS revisited: from heuristic to integrated framework for the successful implementation of knowledge into practice. *Implement Sci* 2016;**11**:33. doi: 10.1186/s13012-016-0398-2
28. Graham ID, Logan J, Harrison MB, et al. Lost in knowledge translation: time for a map? *J Contin Educ Health Prof* 2006;**26**: doi: 10.1002/chp.47
29. The Special Programme for Research and Training in Tropical Diseases (TDR), World Health Organisation. Implementation Research Toolkit. <http://www.who.int/tdr/> 2014; TDR/RCS/14/1. (accessed 4th December 2017).
30. Proctor EK, Silmere H, Raghavan R, et al. Outcomes for implementation research: conceptual distinctions, measurement challenges, and research agenda. *Adm Policy Ment Health* 2011;**38**: doi: 10.1007/s10488-010-0319-7
31. Glasgow RE, McKay HG, Piette JD, et al. The RE-AIM framework for evaluating interventions: what can it tell us about approaches to chronic illness management? *Patient Educ Couns* 2001;**44**: doi: 10.1016/S0738-3991(00)00186-5
32. RE-AIM. RE-AIM.org <http://re-aim.org/about/what-is-re-aim/reach/>. 2017; (22nd November 2017).
33. Powell BJ, Beidas RS, Lewis CC, et al. Methods to Improve the Selection and Tailoring of Implementation Strategies. *J Behav Health Serv Res* 2017;**44**:177-94. doi: 10.1007/s11414-015-9475-6 [published Online First: 21 August 2017]
34. Castro FG, Barrera M, Martinez CR. The cultural adaptation of prevention interventions: resolving tensions between fidelity and fit. *Prevention Science* 2004;**5**:41-5. doi: 10.1023/B:PREV.0000013980.12412.cd
35. Centre for Substance Abuse Prevention USA, Substance Abuse and Mental Health Services Administration, US Department of Health and Human Services. Finding the Balance: Program Fidelity and Adaptation in Substance Abuse Prevention. A State-of-the-art review. <https://www.csun.edu/sites/default/files/FindingBalance1.pdf>. 2002. (accessed 6th Nov 2017).
36. Solomon J, Card JJ, Malow RM. Adapting efficacious interventions: advancing translational research in HIV prevention. *Eval Health Prof* 2006;**29**:162-94. doi: 10.1177/0163278706287344 [published Online First: 29 April 2006]
37. Tortolero SR. Using intervention mapping to adapt an effective HIV, sexually transmitted disease, and pregnancy prevention program for high-risk minority youth. *Health Promot Pract* 2005;**6**: doi: 10.1177/1524839904266472
38. McKleroy VS, Galbraith JS, Cummings B, et al. Adapting evidence-based behavioral interventions for new settings and target populations. *AIDS Educ Prev* 2006;**18**:59-73. doi: 10.1521/aeap.2006.18.supp.59
39. Wingood GM, DiClemente RJ. The ADAPT-ITT model: a novel method of adapting evidence-based HIV Interventions. *J Acquir Immune Defic Syndr* 2008;**47**:40-6. doi: 10.1097/QAI.0b013e3181605df1 [published Online First: 9 April 2008]
40. Kilbourne AM, Neumann MS, Pincus HA, et al. Implementing evidence-based interventions in health care: application of the replicating effective programs framework. *Implement Sci* 2007;**2**:42. doi: 10.1186/1748-5908-2-42

41. ADAPTE Collaboration. The ADAPTE Process: Resource Toolkit for Guideline Adaptation. <http://www.g-i-n.net/>. 2009. (accessed 17th November 2017).
42. Bauman LJ, Stein REK, Ireys HT. Reinventing fidelity: the transfer of social technology among settings. *Am J Community Psychol* 1991;**19**:619-39. doi: 10.1007/BF00937995
43. Collins LM, Murphy SA, Bierman KL. A conceptual framework for adaptive preventive interventions. *Prev Sci* 2004;**5**:185-96. [published Online First: 9 October 2004]
44. Bellg A, Borrelli B, Resnick B, et al. Enhancing treatment fidelity in health behaviour change studies: Best practices and recommendations from the NIH Behavior Change Consortium. *Health Psychol* 2004;**23**: doi: 10.1037/0278-6133.23.5.443
45. Gearing RE, El-Bassel N, Ghesquiere A, et al. Major ingredients of fidelity: a review and scientific guide to improving quality of intervention research implementation. *Clin Psychol Rev* 2011;**31**:79-88. doi: 10.1016/j.cpr.2010.09.007 [published Online First: 7 December 2010]
46. Carroll C, Patterson M, Wood S, et al. A conceptual framework for implementation fidelity. *Implement Sci* 2007;**2**:40. doi: 10.1186/1748-5908-2-40
47. Hasson H. Systematic evaluation of implementation fidelity of complex interventions in health and social care. *Implement Sci* 2010;**5**:67. doi: 10.1186/1748-5908-5-67
48. Pérez D, Van der Stuyft P, Zabala MC, et al. A modified theoretical framework to assess implementation fidelity of adaptive public health interventions. *Implement Sci* 2016;**11**:91. doi: 10.1186/s13012-016-0457-8
49. Holliday J, Audrey S, Moore L, et al. High fidelity? How should we consider variations in the delivery of school-based health promotion interventions? *Health Educ J* 2009;**68**:44-62. doi: 10.1177/0017896908100448
50. Haynes A, Brennan S, Redman S, et al. Figuring out fidelity: a worked example of the methods used to identify, critique and revise the essential elements of a contextualised intervention in health policy agencies. *Implement Sci* 2016;**11**:23. doi: 10.1186/s13012-016-0378-6
51. Edwards N, Barker PM. The importance of context in implementation research. *J Acquir Immune Defic Syndr* 2014;**67**:S157-62. doi: 10.1097/qai.0000000000000322 [published Online First: 14 October 2014]
52. Moore GF, Audrey S, Barker M, et al. Process evaluation of complex interventions: Medical Research Council guidance. *BMJ : British Medical Journal* 2015;**350**:1258. doi: 10.1136/bmj.h1258
53. Lara M, Bryant-Stephens T, Damitz M, et al. Balancing “fidelity” and community context in the adaptation of asthma evidence-based interventions in the “real world”. *Health Promotion Practice* 2011;**12**:63S-72S. doi: 10.1177/1524839911414888
54. Hoffmann TC. Better reporting of interventions: template for intervention description and replication (TIDieR) checklist and guide. *BMJ* 2014;**348**: doi: 10.1136/bmj.g1687
55. Willis CD, Riley BL, Stockton L, et al. Scaling up complex interventions: insights from a realist synthesis. *Health Research Policy and Systems* 2016;**14**:88. doi: 10.1186/s12961-016-0158-4
56. Best A, Greenhalgh T, Lewis S, et al. Large-system transformation in health care: a realist review. *Milbank Q* 2012;**90**:421-56. doi: 10.1111/j.1468-0009.2012.00670.x [published Online First: 19 September 2012]
57. Norton WE, Mittman BS. Scaling-Up Health Promotion/Disease Prevention Programs in Community Settings: Barriers, Facilitators, and Initial Recommendations. The Patrick and Catherine Weldon Donaghue Medical Research Foundation. <http://www.donaghue.org/> 2010. (accessed 29th January 2017).
58. Rogers EM. Diffusion of innovations. New York: Free Press 2003.
59. Paina L, Peters DH. Understanding pathways for scaling up health services through the lens of complex adaptive systems. *Health Policy Plan* 2012;**27**:365-73. doi: 10.1093/heapol/czr054
