# Supplementary material
Source: HighWire-hosted journal article supplement (https://bmjopen.bmj.com/content/9/1/e022084)
Supplement: inline-supplementary-material-4 [file inline-supplementary-material-4.pdf]

#### **Supplemental File 4. Draft Data Extraction Form (to be further refined as needed)**

**Scale-up example (location, intervention):**

**References of articles/documents included:**

**Details of Intervention:**

**Topic (e.g. nutrition, HIV):**

**Study Type(s):**

**Summary (short description of case example of scale-up):**

**1. Adaptations** (Please see codebook for further descriptions as needed)

**What adaptations were made and to what elements?** (give details where discussed)

**(i) Content** (e.g. changes to intervention procedure, materials or delivery):

**(ii) Context** (e.g. changing the delivery channel, format, setting, personnel, population):

**(iii) Training/Evaluation** (e.g. longer/shorter training, style of training etc.):

**At what level was the adaptation made?** (where discussed, refer to codebook as needed)

**Who made decision to adapt?** (where discussed, refer to codebook as needed)

**Why decision to adapt?** (where discussed)

**2. Actions**

**Actions for Adaptations** (please list with short descriptions of what was carried out, refer to codebook as needed):

**3. Context-Mechanism-Outcomes (CMOCs)**

Please provide details of CMOCs identified below relating to actions for adaptations, please provide quotes to support and any reasoning for any inferred contexts or mechanisms, refer to codebook as needed.

**CMOC 1.**

Action (mechanism resource):

Context:

Mechanism (reasoning or response):

Outcome:

CMOC:

Supporting quotes or reasoning:

**CMOC 2.**

Action (mechanism resource):

Context:

Mechanism (reasoning or response):

Outcome:

CMOC:

Supporting quotes or reasoning:

**Please add as many as needed below e.g. CMOC 3, CMOC 4**
